# Supplementary material for: Comprehensive Assessment of Lifetime Cigarette Smoking and Its Association with Health-Related Quality of Life among Older US Adults—A Cross-sectional Study
Source: PubMed Central journal article supplement (PMC11601830; doi:10.21203/rs.3.rs-5319716/v1), 2024-11-17
Supplement: NIHPPRS5319716V1-supplement-1.pdf [file NIHPPRS5319716V1-supplement-1.pdf]

## Supplementary Files

This is a list of supplementary files associated with this preprint. Click to download.

- [Tables.docx](#)
